# Supplementary material for: Fe nanopowder-assisted fabrication of FeOx/porous carbon for boosting potassium-ion storage performance
Source: Royal Society of Chemistry journal article supplement (doi:10.1039/d0nr08711d), 2020-12-28
Supplement: d0nr08711d1.pdf [file d0nr08711d1.pdf]

## Supporting Information

### Fe nanopowder-assisted fabrication of FeO<sub>x</sub>/porous carbon for boosting potassium-ion storage performance

Tianqi Wang, Wei Liu,\* Xiang Gao, Yuan Zhang, Yongxu Du, Wenting Feng, Hongguang Fan

School of Materials Science and Engineering, Ocean University of China, Qingdao 266100,

People's Republic of China.

Email: weiliu@ouc.edu.cn (W. Liu).

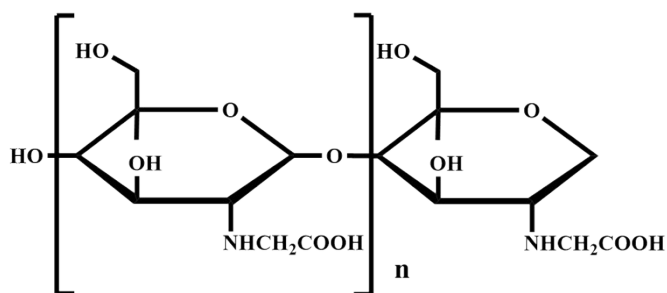

Figure S1 Molecular formula of the carboxymethyl chitosan.

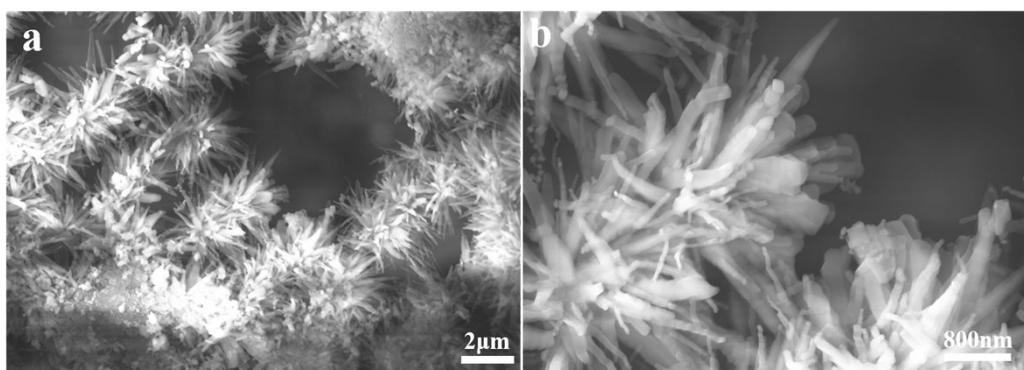

Figure S2 (a, b) SEM images of biom mineralized precursor via a freeze-drying process without carbonization.

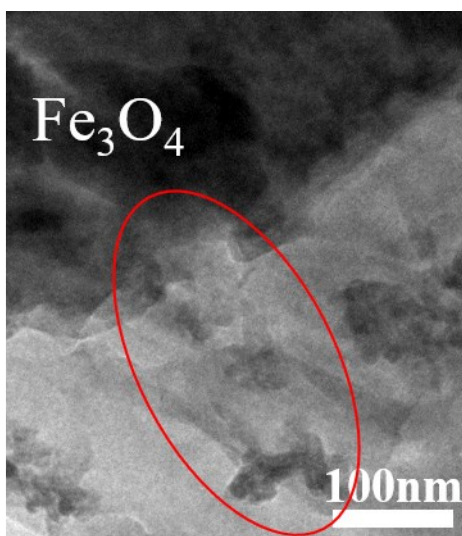

Figure S3 TEM images of GBHCs without removing  $\text{Fe}_3\text{O}_4$  particles.

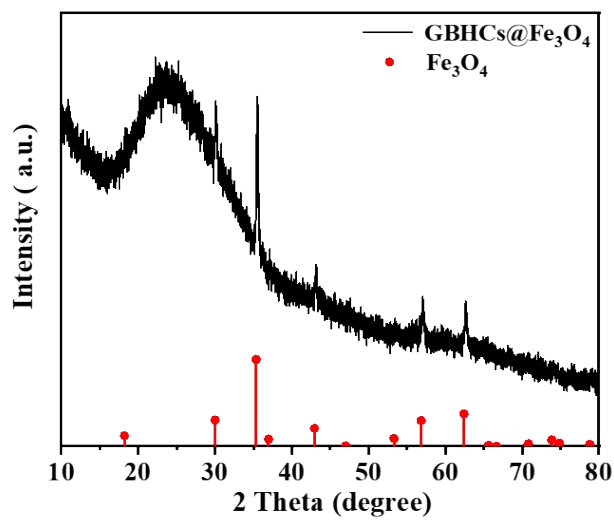

Figure S4 XRD pattern of GBHCs without removing  $\text{Fe}_3\text{O}_4$ .

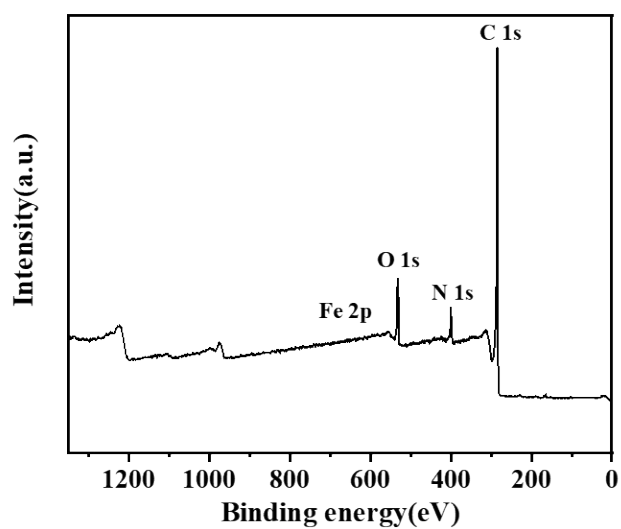

Figure S5 XPS survey spectra of the GBHCs.

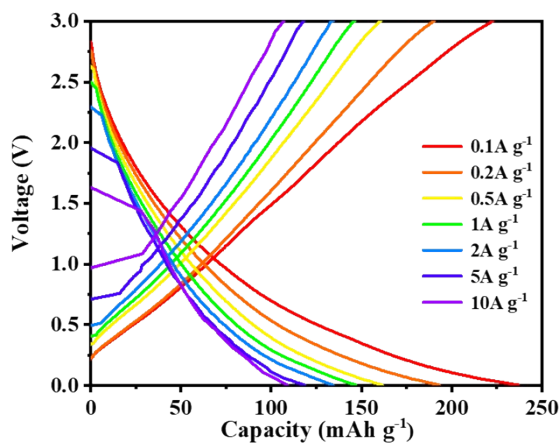

Figure S6 Galvanostatic charge-discharge curves at different current densities of BHCs electrode.

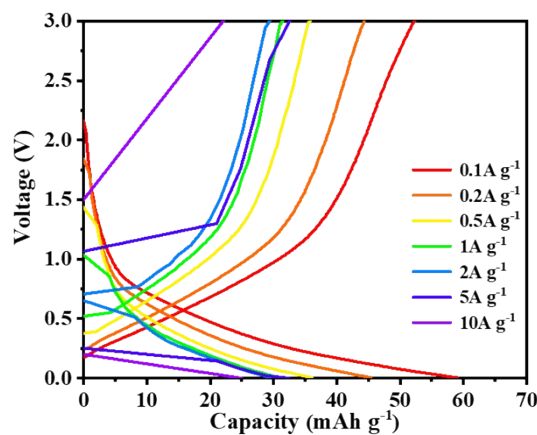

Figure S7 Galvanostatic charge-discharge curves at different current densities of GC electrode.

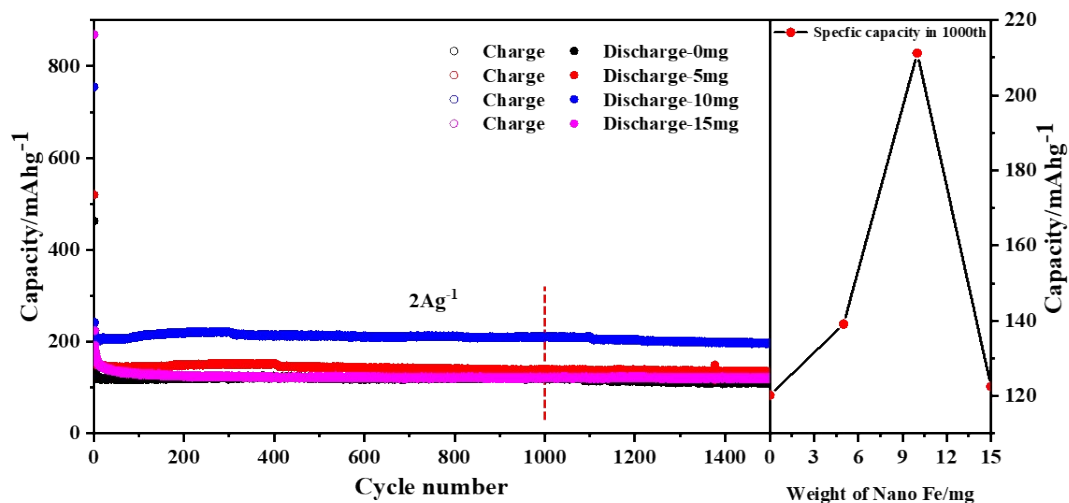

Figure S8 Cycling performance of FeO<sub>x</sub>@GBHCs prepared with various Fe powders at current density of 2A g<sup>-1</sup>.

It can be noted that the cycling capacity increases continuously as the Fe powders content

increasing from 0 to 10mg, but a decrease when the amount reaches 15mg.

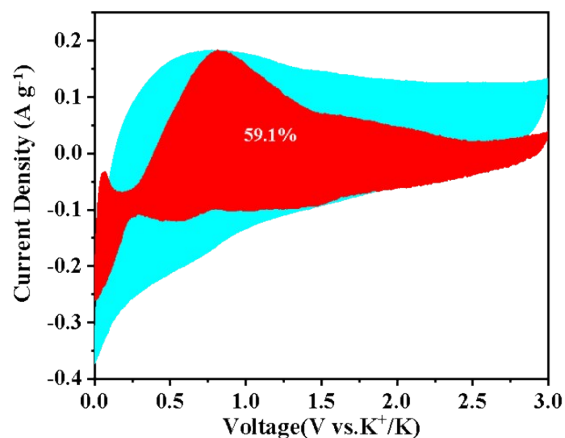

Figure S9 Contribution ratio of the capacitive and diffusion-controlled of BHCs charge at 0.6 mV s<sup>-1</sup>.

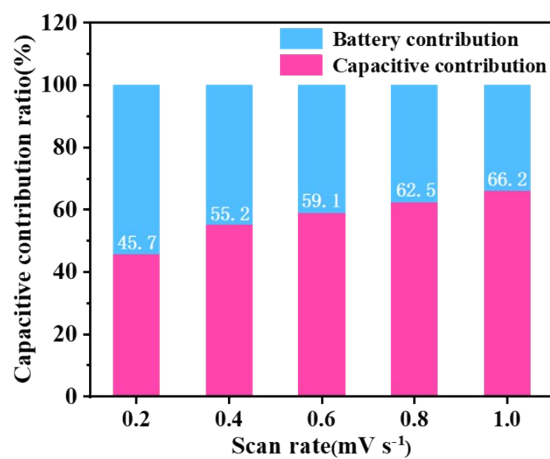

Figure S10 Normalized contribution proportions of capacitance and diffusion of BHCs at different scan rates.

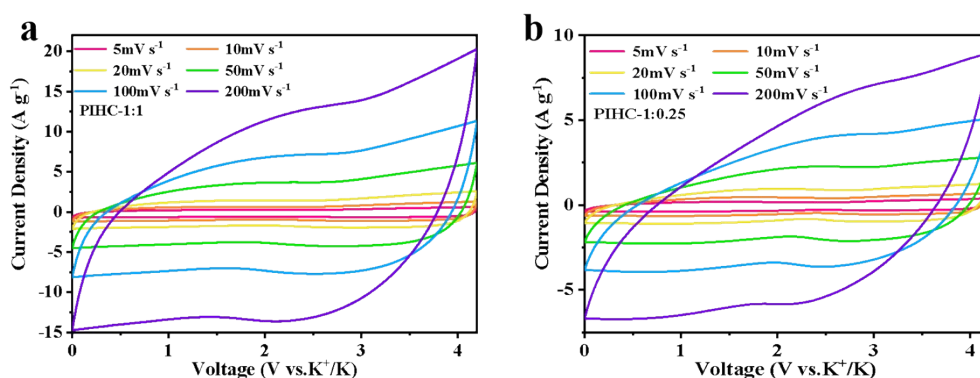

Figure S11 Typical CV curves of the GBHCs // AC PIHCs at different scan rates of the 5-200 mV s<sup>-1</sup> for the voltage window of 0-4.2 V.

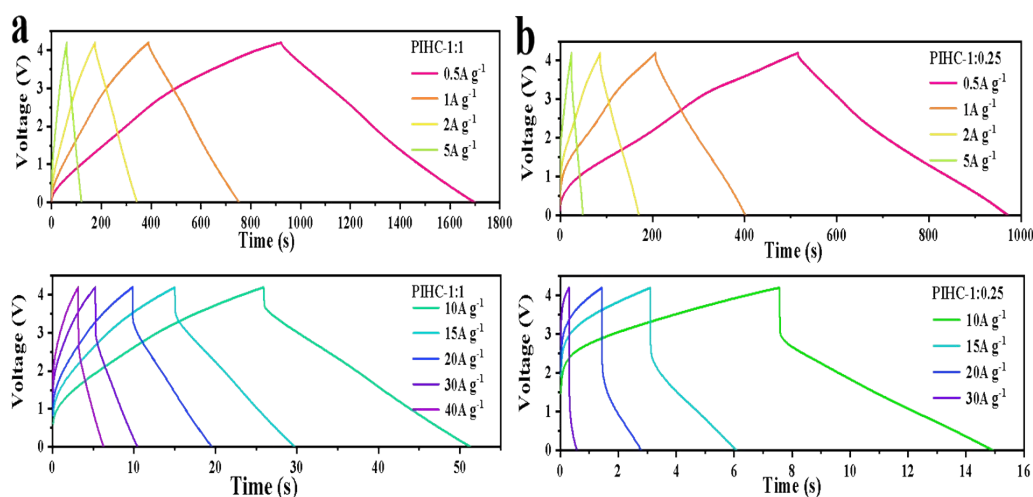

Figure S12 Typical charge-discharge curves of the GBHCs//AC PIHCs at different current densities of the 0.5-30 A g<sup>-1</sup> for the voltage window of 0-4.2V.

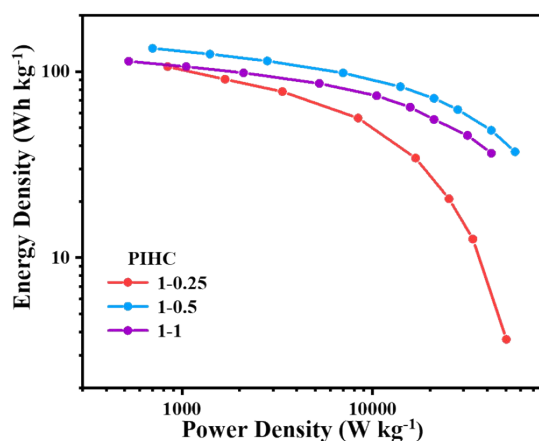

Figure S13 Ragone plots of the GBHCs//AC PIHC with different anode /cathode mass ratio.

Table S1 The specific BET surface area of BHCs and GBPCs.

| Sample name | BET Surface Area (m <sup>2</sup> /g) |
|-------------|--------------------------------------|
| BHCs        | 970.5247                             |
| GBHCs       | 941.3968                             |

Table S2 Comparisons of the cycling performance of GBHCs electrode with other carbonbased

anode materials in PIBs reported in open literature.

| Sample                                                     | Cycling performance                                                                                                      | Ref                  |
|------------------------------------------------------------|--------------------------------------------------------------------------------------------------------------------------|----------------------|
| GBHCs                                                      | 200 mAh g <sup>-1</sup> (3000 cycles, 2A g <sup>-1</sup> )                                                               | This work            |
| N/O co-doped carbon                                        | 131 mAh g <sup>-1</sup> (360 cycles, 0.5A g <sup>-1</sup> )                                                              | Ref. [41] of the txt |
| Phosphorus/Nitrogen<br>Cofunctionalized carbon             | 218 mAh g <sup>-1</sup> (3000 cycles, 1A g <sup>-1</sup> )                                                               | Ref. [44] of the txt |
| Short-Range Order carbon                                   | 146.5 mAh g <sup>-1</sup> (1000 cycles, 1A g <sup>-1</sup> )                                                             | Ref. [46] of the txt |
| S/O co-doped carbon                                        | 108 mAh g <sup>-1</sup> (2000 cycles, 1A g <sup>-1</sup> )                                                               | Ref. [51] of the txt |
| N doped carbon nanosheets                                  | 151 mAh g <sup>-1</sup> (1000 cycles, 1A g <sup>-1</sup> )                                                               | Ref. [56] of the txt |
| SiC-carbide-derived carbon                                 | 192 mAh g <sup>-1</sup> (1000 cycles, 1A g <sup>-1</sup> )                                                               | Ref. [57] of the txt |
| Bacterial-Derived carbon                                   | 158 mAh g <sup>-1</sup> (1000 cycles, 1A g <sup>-1</sup> )<br>141 mAh g <sup>-1</sup> (1500 cycles, 2A g <sup>-1</sup> ) | Ref. [58] of the txt |
| Highly nitrogen doped carbon<br>nanofibers                 | 146 mAh g <sup>-1</sup> (4000 cycles, 2A g <sup>-1</sup> )                                                               | Ref. [59] of the txt |
| Co <sub>2</sub> P@Nitrogen-rich hollow<br>carbon nanocages | 130 mAh g <sup>-1</sup> (1000 cycles, 1A g <sup>-1</sup> )                                                               | [1]                  |
| VO/C                                                       | 241 mAh g <sup>-1</sup> (1000 cycles, 1A g <sup>-1</sup> )                                                               | [2]                  |
| FeS/MoS <sub>2</sub> @N-Doped carbon<br>Nanocubes          | 232 mAh g <sup>-1</sup> (10000 cycles, 1A g <sup>-1</sup> )                                                              | [3]                  |

## References

1. D. Das, D. Sarkar, S. Nagarajan and D. Mitlin, *Chem Commun (Camb)*, 2020, **56**, 14889-14892.
2. J. Lu, C. Wang, G. Xia, H. Tong, Y. Yang, D. Zhu and Q. Chen, *J. Mater. Chem. A*, 2020, **8**, 23939-23946.
3. J. Chu, Q. Yu, K. Han, L. Xing, C. Gu, Y. Li, Y. Bao and W. Wang, *J. Mater. Chem. A*, 2020, **8**, 23983-23993.
